# Supplementary material for: A new heptadentate picolinate-based ligand and its corresponding Gd(iii) complex: the effect of pendant picolinateversusacetate on complex properties
Source: Royal Society of Chemistry journal article supplement (doi:10.1039/c7dt04150k), 2017-11-30
Supplement: c7dt04150k1.pdf [file c7dt04150k1.pdf]

# A New Heptadentate Picolinate–Based Ligand and Its Corresponding Gd(III) Complex: the Effect of Picolinate *versus* Acetate Pendant on Complex Property

Bedika Phukan,<sup>a</sup> Chandan Mukherjee\*<sup>a</sup> and Raunak Varshney<sup>b</sup>

**\*Corresponding address:**

Dr. Chandan Mukherjee, Department of Chemistry, Indian Institute of Technology Guwahati, Guwahati, 781039, Assam, India

Email: [cmukherjee@iitg.ernet.in](mailto:cmukherjee@iitg.ernet.in)

Phone No. +91-361-258-2327

Fax: +91-361-258-2349

| <b>Contents</b>                                                                                      | <b>Page</b> |
|------------------------------------------------------------------------------------------------------|-------------|
| <sup>1</sup> H and <sup>13</sup> C NMR spectra of ligand H <sub>4</sub> peada                        | S3          |
| IR and ESI-MS(+ve) of ligand H <sub>4</sub> peada                                                    | S4          |
| IR and ESI-MS(+ve) of complex <b>1</b>                                                               | S5          |
| IR and ESI-MS(+ve) of complex <b>2</b>                                                               | S6          |
| Changes in UV–vis spectra of xylenol orange upon addition of different concentrations of Gd(III) ion | S7          |
| Calibration curve obtained from the spectrophotometric changes of xylenol orange                     | S7          |

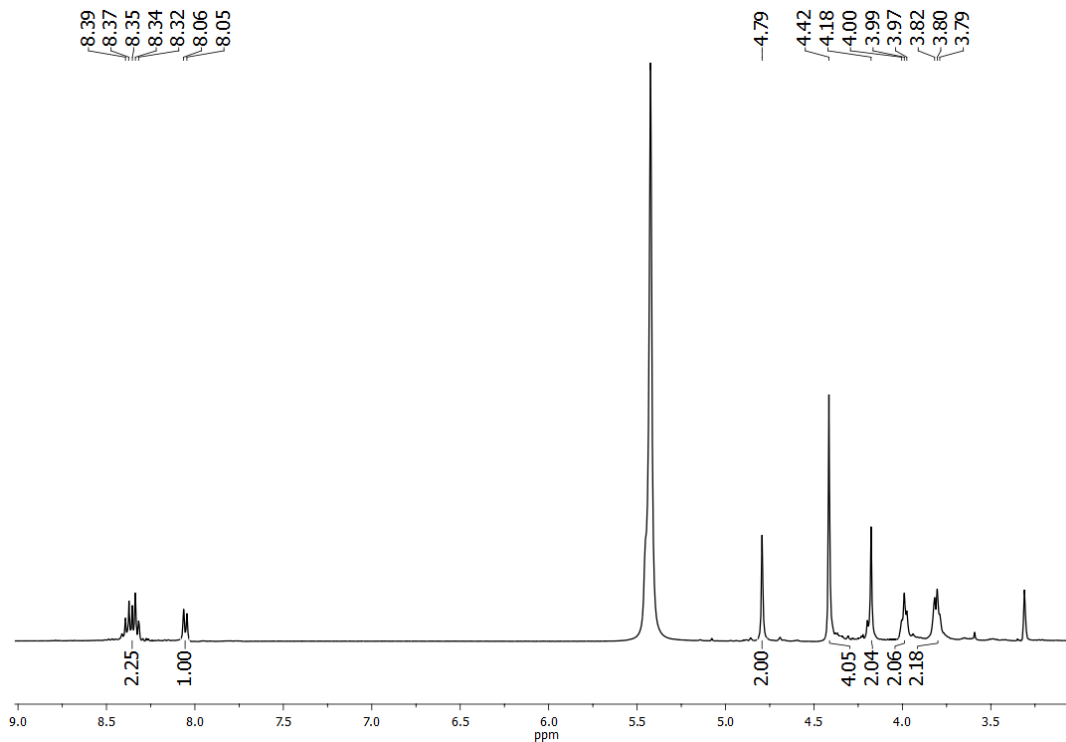

**Figure S1.**  $^1\text{H}$  NMR spectrum of  $\text{H}_4\text{peada}$  measured in  $\text{CD}_3\text{OD}$  solvent.

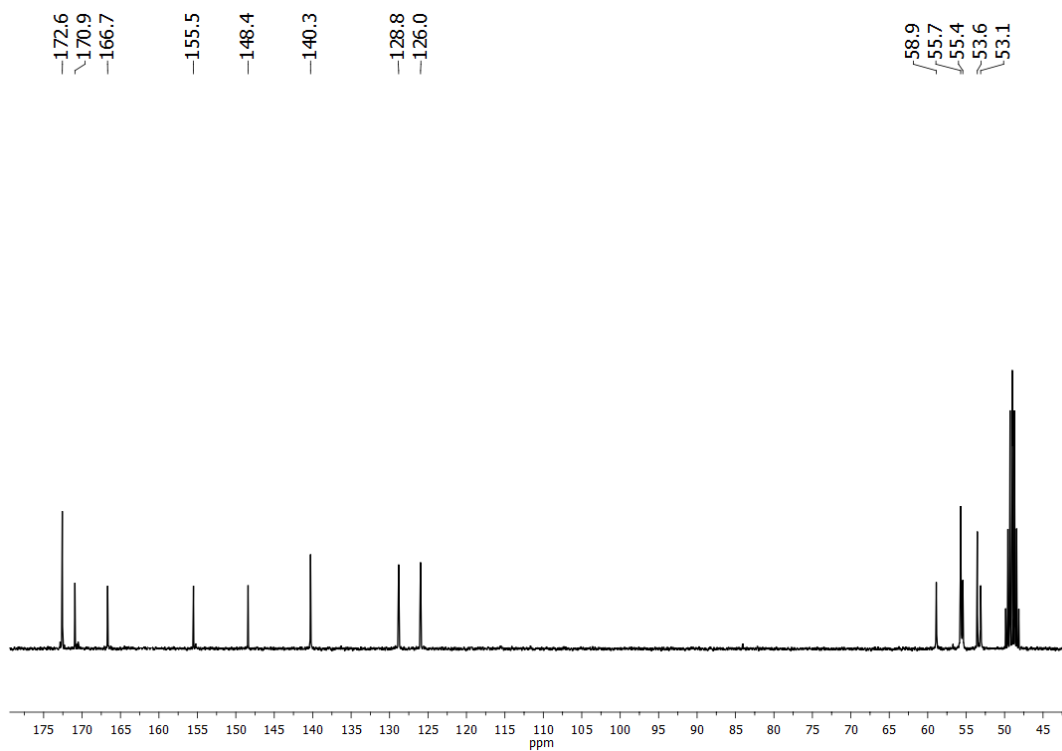

**Figure S2.**  $^{13}\text{C}$  NMR spectrum of ligand  $\text{H}_4\text{peada}$  measured in  $\text{CD}_3\text{OD}$  solvent.

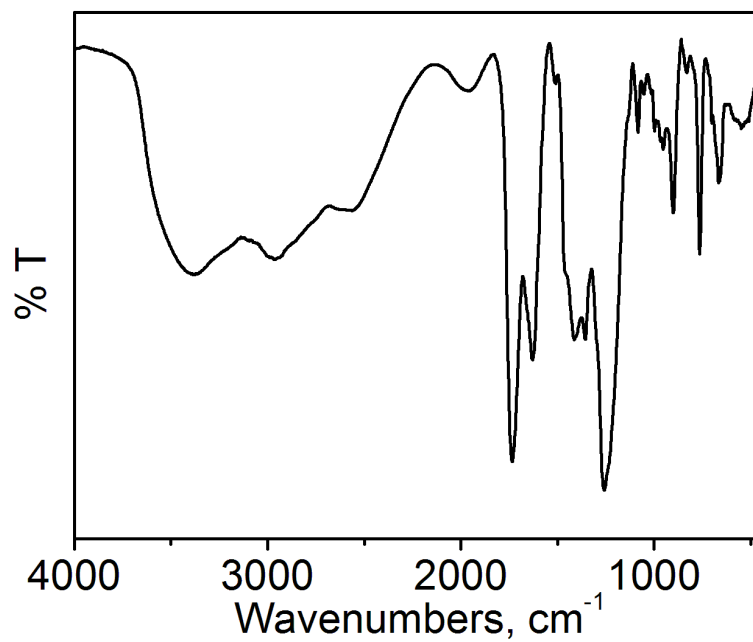

**Figure S3.** FTIR spectrum of ligand H<sub>4</sub>peada.

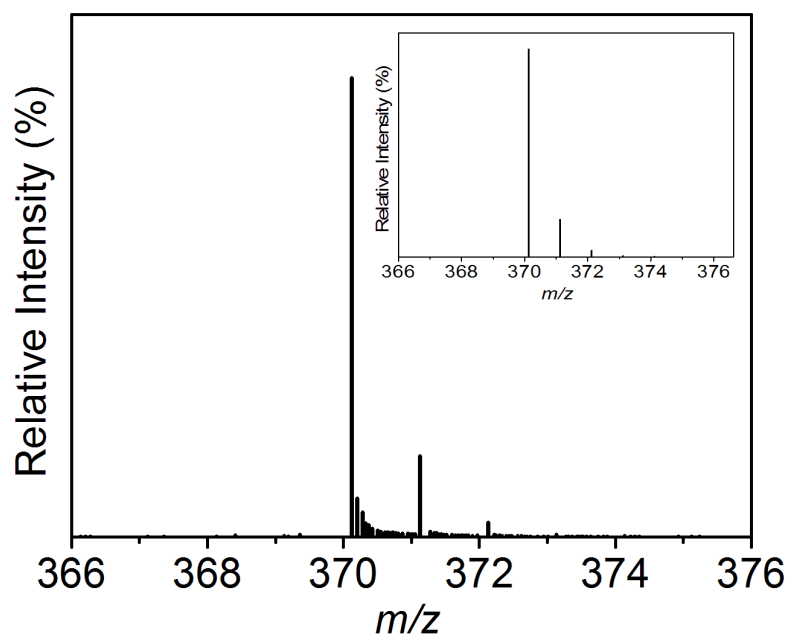

**Figure S4.** ESI-MS (+ve) mass spectrum of ligand H<sub>4</sub>peada. Simulated spectrum has been given as inset.

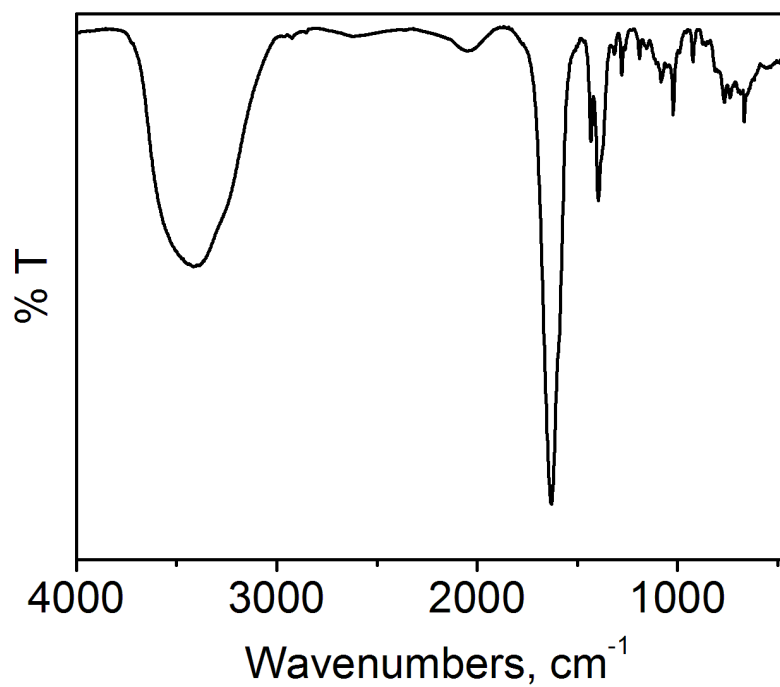

**Figure S5.** FTIR spectrum of complex **1**.

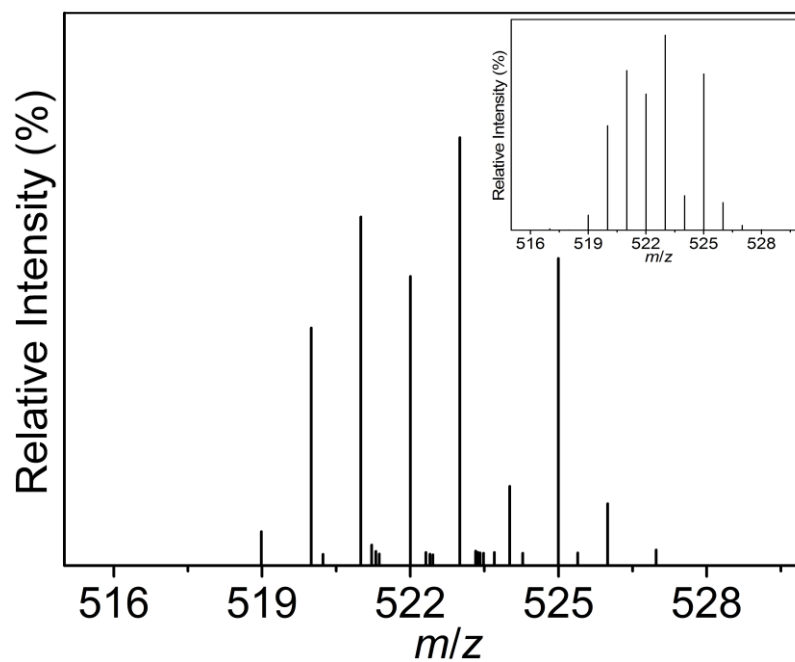

**Figure S6.** ESI-MS (-ve) mass spectrum of complex **1**. Simulated spectrum has been given as inset.

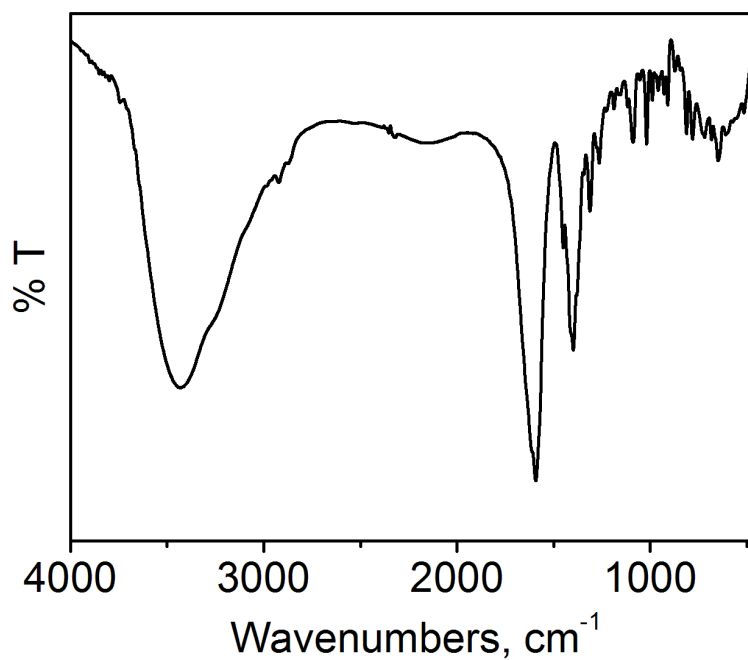

**Figure S7.** FTIR spectrum of complex 2.

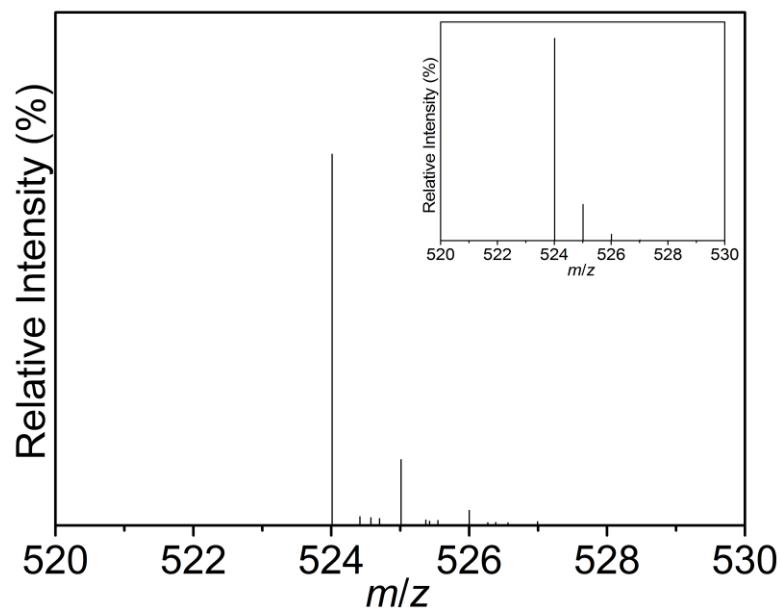

**Figure S8.** ESI-MS (-ve) mass spectrum of complex 2. Simulated spectrum has been given as inset.

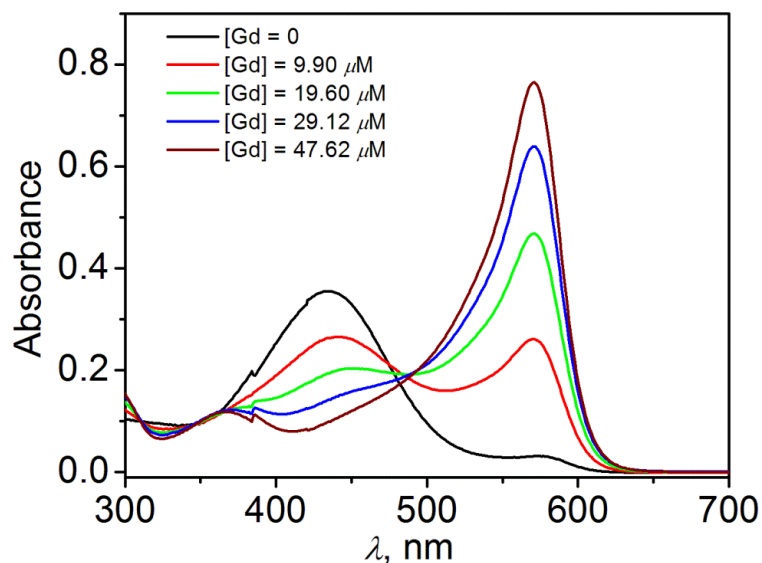

**Figure S9.** UV-vis spectrum of xylenol orange solution in acetate buffer (pH = 5.8) in the presence of varied concentrations of Gd(III) ions, from zero to 47.62  $\mu\text{M}$ .

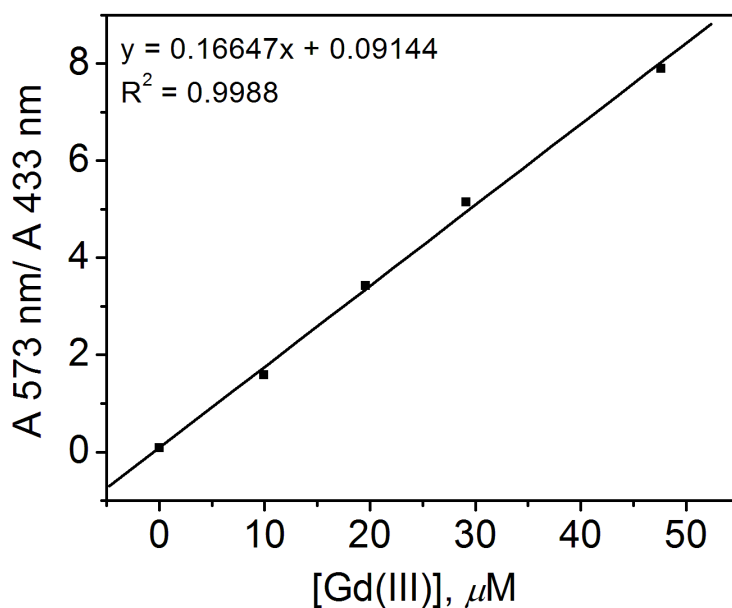

**Figure S10.** Calibration curve obtained from the spectrophotometric changes of xylenol orange (in acetate buffer, pH = 5.8) absorptions in the presence of varied concentrations of Gd(III) ions. For 50  $\mu\text{L}$  of complex **1** ([complex **1**] = 27.5 mM) in 2.0 mL xylenol orange solution (pH = 5.8),  $A_{573\text{ nm}}/A_{433\text{ nm}} = 0.0987$ .
